# Supplementary material
Source: Springer Nature journal article supplement (https://www.springermedizin.de/resource/supplementary/12955_2007_476_MOESM1_ESM.pdf/9560540)

## Patient satisfaction, significant results

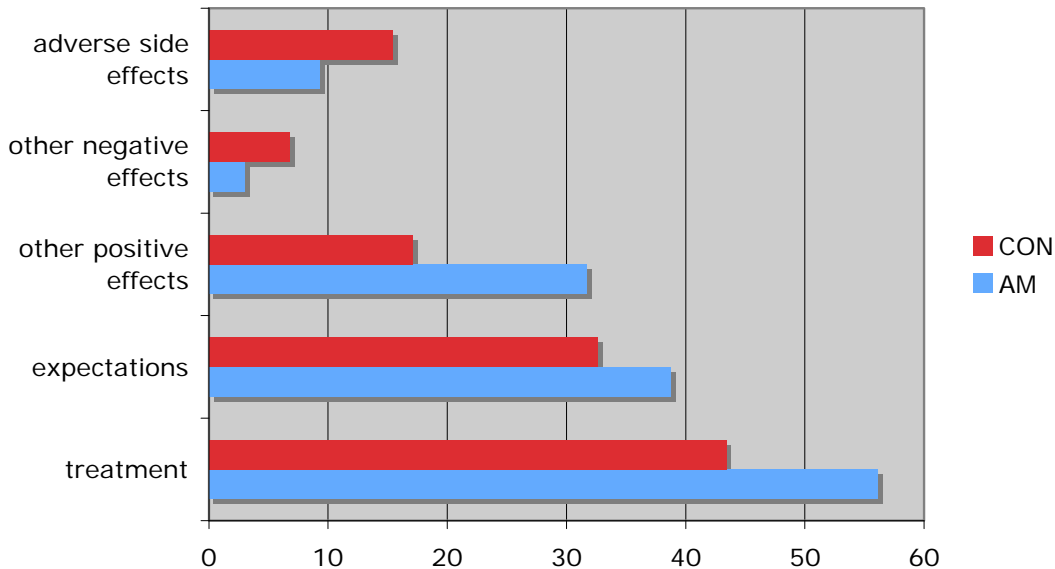

Supplement: MOESM1 [file 9560540]
